# Supplementary material for: Carborane-based BODIPY dyes: synthesis, structural analysis, photophysics and applications
Source: PubMed Central journal article supplement (PMC11574714; doi:10.3389/fchem.2024.1485301), 2024-11-05
Supplement: DataSheet1.pdf [file DataSheet1.pdf]

# Carborane-Based BODIPY Dyes: Synthesis, Structural Analysis, Photophysics and Applications

## Supporting Information

Javier Ordóñez-Hernández, José Giner Planas, Rosario Núñez\*

*Institut de Ciència de Materials de Barcelona (ICMAB-CSIC), Campus de la UAB, 08193,  
Bellaterra, Barcelona (Spain)*

### TABLE OF CONTENTS

|                                                                                                                                                                                                   |    |
|---------------------------------------------------------------------------------------------------------------------------------------------------------------------------------------------------|----|
| <b>Table S1.</b> Photophysical properties of Ziesseľ's D-A dyads.....                                                                                                                             | S2 |
| <b>Table S2.</b> Photophysical properties and <b>BDP-18</b> , <b>BDP-19</b> and <b>BDP-<i>o</i>CB-12</b> and <b>BDP-<i>o</i>CB-13</b> .....                                                       | S3 |
| <b>Table S3.</b> Optical properties of axle <b>BDP-23</b> and nanocars.....                                                                                                                       | S3 |
| <b>Table S4.</b> Photoluminescence (PL) behaviors of <b>BDP-<i>o</i>CB-17</b> and <b>BDP-<i>o</i>CB-18</b> .....                                                                                  | S3 |
| <b>Table S5.</b> Absorption and emission properties of carborane-BODIPY and aza-BODIPY dyes in THF at r.t.....                                                                                    | S4 |
| <b>Table S6.</b> Absorption and emission properties of BODIPYs at room temperature.....                                                                                                           | S5 |
| <b>Table S7.</b> Photophysical properties of BODIPYs decorated with mercaptocarboranes in EtOH.....                                                                                               | S5 |
| <b>Table S8.</b> Crystallographic parameters measured for <i>meso</i> -substituted carboranylthio BODIPY structures. See Figure 1a for the molecular structures and Chart 1 for nomenclature..... | S6 |
| <b>Table S9.</b> Crystallography parameters measured for 3/5-substituted carboranylthio BODIPY structures. See Figure 1b for the molecular structures and Chart 1 for nomenclature.....           | S6 |
| <b>Table S10.</b> Crystallography parameters measured for carboranyl-aryl BODIPY structures. See Figure 2 for the molecular structures and Chart 1 for nomenclature.....                          | S6 |
| <b>Table S11.</b> Photophysical data for anionic boron clusters-BODIPY conjugates.....                                                                                                            | S7 |
| <b>Table S12.</b> Permeability and Partition coefficient (Log P) of some compounds.....                                                                                                           | S8 |
| <b>Table S13.</b> Spectroscopic data of <b>BDP-<i>nido</i>CB-1</b> and <b>BDP-<i>nido</i>CB 2</b> .....                                                                                           | S8 |
| <b>References</b> .....                                                                                                                                                                           | S9 |

**Table S1.** Photophysical properties of Ziessel's D-A dyads. (Ziessel et al., 2010),(Hablott et al., 2012), (Harriman et al., 2013), (Hablott et al., 2013)

| <b>Compound</b>                         | <b>Donor</b> | <b>Acceptor</b> | <b>Linker</b>               | $\lambda_{\text{abs}}$<br><b>(nm)</b> | $\lambda_{\text{em}}$<br><b>(nm)</b> | <b>QY</b> | $k_{\text{ET}}(\text{s}^{-1})$ |
|-----------------------------------------|--------------|-----------------|-----------------------------|---------------------------------------|--------------------------------------|-----------|--------------------------------|
| <b>BDP-<i>p</i>CB-1<sup>a</sup></b>     | BDP-1        | BDP-2           | <i>p</i> CB                 | 694                                   | 728                                  | 0.30      | 6.2x10 <sup>8</sup>            |
| <b>BDP-<i>p</i>-CB-1+H<sup>+a</sup></b> | BDP-1        | BDP-2           | <i>p</i> CB                 | 628                                   | 638                                  | 0.42      | 1.7x10 <sup>9</sup>            |
| <b>BDP-<i>P</i>CB-2<sup>b</sup></b>     | DPP          | SubPc           | <i>p</i> CB                 | 645                                   | 659                                  | 0.47      | 1.7x10 <sup>9</sup>            |
| <b>BDP-<i>p</i>CB-3<sup>b</sup></b>     | DPP          | BDP             | <i>p</i> CB                 | 645                                   | 659                                  | 0.47      | 1.2x10 <sup>10</sup>           |
| <b>BDP-<i>P</i>CB-4<sup>b</sup></b>     | DPP          | SubPc           | ( <i>p</i> CB) <sub>2</sub> | 645                                   | 659                                  | 0.36      | 3.2x10 <sup>8</sup>            |
| <b>BDP-<i>p</i>CB-5<sup>c</sup></b>     | DPP          | BDP             | <i>p</i> CB                 | 672                                   | 687                                  | N/R       | 3.1x10 <sup>9</sup>            |
| <b>BDP-<i>o</i>CB-6<sup>c</sup></b>     | DPP          | BDP             | <i>o</i> CB                 | 672                                   | 687                                  | N/R       | 1.9x10 <sup>10</sup>           |
| <b>BDP-<i>p</i>CB-2<sup>c</sup></b>     | DPP          | BDP             | <i>p</i> CB                 | 645                                   | 662                                  | 0.10      | 2.1x10 <sup>9</sup>            |
| <b>BDP-<i>p</i>CB-7<sup>c</sup></b>     | DPP          | BDP             | ( <i>p</i> CB) <sub>2</sub> | 645                                   | 662                                  | 0.44      | 1.9x10 <sup>8</sup>            |
| <b>BDP-<i>p</i>CB-8<sup>c</sup></b>     | DPP          | BDP             | ( <i>p</i> CB) <sub>3</sub> | 645                                   | 662                                  | 0.73      | 4.1x10 <sup>7</sup>            |
| <b>BDP-<i>p</i>CB-9<sup>c</sup></b>     | DPP          | BDP             | ( <i>p</i> CB) <sub>4</sub> | 645                                   | 662                                  | 0.81      | 1.4x10 <sup>7</sup>            |
| <b>BDP-<i>p</i>CB-10<sup>c</sup></b>    | DPP          | BDP             | ( <i>p</i> CB) <sub>5</sub> | 645                                   | 662                                  | 0.84      | 4.2x10 <sup>6</sup>            |

<sup>a</sup>1,4-dioxane; <sup>b</sup>THF; <sup>c</sup>2-MTHF

**Table S2.** Photophysical properties and **BDP-18**, **BDP-19** and **BDP-*o*CB-12** and **BDP-*o*CB-13**.(Jin et al., 2015)

| Compounds                | $\lambda_{\text{abs}}$ (nm) | $\epsilon_{\text{max}}$<br>( $\text{M}^{-1}\text{cm}^{-1}$ ) | $\lambda_{\text{em}}$ (nm) <sup>a</sup> | $\tau_{\text{f}}$ (nm) <sup>b</sup> | QY <sup>c</sup> |
|--------------------------|-----------------------------|--------------------------------------------------------------|-----------------------------------------|-------------------------------------|-----------------|
| <b>BDP-18</b>            | 526                         | 158489                                                       | 543                                     | 4.0                                 | 0.41            |
| <b>BDP-19</b>            | 526                         | 125893                                                       | 543                                     | 3.8                                 | 0.45            |
| <b>BDP-<i>o</i>CB-12</b> | 531                         | 100000                                                       | 544                                     | 1.8                                 | 0.31            |
| <b>BDP-<i>o</i>CB-13</b> | 530                         | 158489                                                       | 544                                     | 1.4                                 | 0.23            |

<sup>a</sup> $\lambda_{\text{ex}} = 500$  nm, <sup>b</sup> $\lambda_{\text{ex}} = 408$  nm, <sup>c</sup>Reference: rhodamine B (QY= 0.49, 500 nm),  $\lambda_{\text{ex}} = 500$  nm

**Table S3.** Optical properties of axle **BDP-23** and nanocars.(Godoy et al., 2010)

| Compound                 | $\lambda_{\text{abs}}$<br>(nm) | $\epsilon_{\text{max}}$<br>( $\text{M}^{-1}\text{cm}^{-1}$ ) | $\lambda_{\text{em}}$<br>(nm) | QY <sup>a</sup> |
|--------------------------|--------------------------------|--------------------------------------------------------------|-------------------------------|-----------------|
| <b>BDP-23</b>            | 552                            | 116000                                                       | 567                           | 0.85            |
| <b>BDP-<i>p</i>CB-14</b> | 554                            | 123000                                                       | 571                           | 0.69            |
| <b>BDP-<i>p</i>CB-15</b> | 552                            | 181000                                                       | 569                           | 0.70            |
| <b>BDP-<i>p</i>CB-16</b> | 552                            | 191000                                                       | 567                           | 0.79            |

<sup>a</sup>Determined in chloroform solution, ca  $1 \times 10^{-7}$  M. Using rhodamine 6G as reference,  $\phi_{\text{F}} = 0.95$  in EtOH,  $\lambda_{\text{exc}} = 488$  nm.

**Table S4.** Photoluminescence (PL) behaviors of **BDP-*o*CB-17** and **BDP-*o*CB-18**.(Tominaga et al., 2014)

| Compound                 | In THF <sup>a</sup>        |                 | Aggregate <sup>b</sup>     |                 | Solid                      |                 |
|--------------------------|----------------------------|-----------------|----------------------------|-----------------|----------------------------|-----------------|
|                          | $\lambda_{\text{em}}$ (nm) | QY <sup>c</sup> | $\lambda_{\text{em}}$ (nm) | QY <sup>c</sup> | $\lambda_{\text{PL}}$ (nm) | QY <sup>c</sup> |
| <b>BDP-<i>o</i>CB-17</b> | 512                        | 0.33            | 533                        | 0.02            | 563                        | <0.01           |
| <b>BDP-<i>o</i>CB-18</b> | 513                        | 0.40            | 529                        | 0.02            | 544                        | <0.01           |

<sup>a</sup> $1 \times 10^{-5}$  M. <sup>b</sup>In THF/H<sub>2</sub>O (v/v=1:99),  $1 \times 10^{-5}$  M. <sup>c</sup>Absolute PL quantum efficiency.

**Table S5.** Absorption and emission properties of carborane-BODIPY and aza-BODIPY dyes in THF at r.t.(Gibbs et al., 2015),(Xuan et al., 2016), (Bellomo et al., 2018), (Labra-Vázquez et al., 2020), (Bellomo et al., 2021).

| Compound                                              |                              | $\lambda_{\text{abs}}$ (nm) | $\lambda_{\text{em}}$ (nm) | Log $\epsilon$<br>( $\text{M}^{-1}\text{cm}^{-1}$ ) | QY    | Stokes shifts<br>(nm) |
|-------------------------------------------------------|------------------------------|-----------------------------|----------------------------|-----------------------------------------------------|-------|-----------------------|
| #                                                     | CB<br>Isomer                 |                             |                            |                                                     |       |                       |
| <b>BDP-Me-<i>o</i>CB-20<sup>a</sup></b>               | <i>o</i> CB                  | 534                         | 561                        | 4.38                                                | 0.99  | 27                    |
| <b>BDP-Me-<i>o</i>CB-21<sup>a</sup></b>               | <i>o</i> CB                  | 501                         | 508                        | 4.81                                                | 0.99  | 7                     |
| <b>BDP-Me-<i>o</i>CB-22<sup>a</sup></b>               | <i>o</i> CB                  | 502                         | 517                        | 4.50                                                | 0.034 | 15                    |
| <b>BDP-Me-<i>o</i>CB-23<sup>b</sup></b>               | <i>o</i> CB                  | 501                         | 512                        | 4.89                                                | 0.404 | 11                    |
| <b>BDP-Me-<i>m</i>CB-24<sup>b</sup></b>               | <i>m</i> CB                  | 501                         | 511                        | 4.91                                                | 0.403 | 10                    |
| <b>BDP-Ph-<i>m</i>CB-25<sup>b</sup></b>               | <i>m</i> CB                  | 501                         | 511                        | 4.92                                                | 0.435 | 10                    |
| <b>BDP-Me-<i>m</i>CB-26<sup>b</sup></b>               | <i>m</i> CB                  | 618                         | 641                        | 4.82                                                | 0.49  | 23                    |
| <b>BDP-Me-<i>m</i>CB-27<sup>c</sup></b>               | <i>m</i> CB                  | 584                         | 640                        | 4.75                                                | 0.14  | 56                    |
| <b>BDP-Ph-<i>m</i>CB-28<sup>c</sup></b>               | <i>m</i> CB                  | 578                         | 643                        | 4.54                                                | 0.11  | 65                    |
| <b>BDP-Ph-<i>m</i>CB-29<sup>c</sup></b>               | <i>m</i> CB                  | 580                         | 640                        | 4.46                                                | 0.14  | 60                    |
| <b>BDP-Me-<i>m</i>CB-Ph-<i>o</i>CB-32<sup>c</sup></b> | <i>m</i> CB,<br><i>o</i> CB  | 578                         | 643                        | 4.69                                                | 0.12  | 65                    |
| <b>BDP-Me-<i>m</i>CB-Ph-<i>m</i>CB-33<sup>c</sup></b> | <i>m</i> CB,<br><i>m</i> CB- | 582                         | 641                        | 4.76                                                | 0.12  | 59                    |
| <b>BDP-Ph-<i>m</i>CB-34<sup>c</sup></b>               | <i>m</i> CB                  | 641                         | 651                        | 4.95                                                | 0.36  | 10                    |
| <b>BDP-Me-<i>o</i>CB-35<sup>d</sup></b>               | <i>o</i> CB                  | 501                         | 520                        | 5.25                                                | 0.011 | 19                    |
| <b>BDP-Ph-<i>o</i>CB-36<sup>d</sup></b>               | <i>o</i> CB                  | 501                         | 520                        | 4.84                                                | 0.012 | 19                    |
| <b>BDP-Ph-<i>m</i>CB-37<sup>d</sup></b>               | <i>m</i> CB                  | 501                         | 521                        | 5.21                                                | 0.006 | 20                    |
| <b>aza-BDP-Me-<i>o</i>CB-38<sup>b</sup></b>           | <i>o</i> CB                  | 665                         | 705                        | 4.86                                                | 0.015 | 40                    |
| <b>aza-BDP-Me-<i>m</i>CB-39<sup>b</sup></b>           | <i>m</i> CB                  | 665                         | 706                        | 4.91                                                | 0.014 | 41                    |
| <b>aza-BDP-Ph-<i>o</i>CB-40<sup>b</sup></b>           | <i>o</i> CB                  | 665                         | 707                        | 4.91                                                | 0.014 | 42                    |

<sup>a</sup>Measured in DMSO; <sup>b</sup>Rhodamine 6G in ethanol (QY = 0.95) (Fischer and Georges, 1996) was used as standard; <sup>c</sup>Rhodamine 101 in methanol (QY = 1) as standard (Brouwer, 2011); <sup>d</sup>Rhodamine B as standard in ethanol (QY = 0.5). (Nostrand et al., 1980)

**Table S6.** Absorption and emission properties of BODIPYs at room temperature. (Wang et al., 2014),(Gibbs et al., 2015), (Zhao et al., 2015), (Xuan et al., 2016)

| <b>Compound</b>                      |                  |                             |                            |                       |                                                                  |                                        |
|--------------------------------------|------------------|-----------------------------|----------------------------|-----------------------|------------------------------------------------------------------|----------------------------------------|
| #                                    | <b>CB Isomer</b> | $\lambda_{\text{abs}}$ (nm) | $\lambda_{\text{em}}$ (nm) | <b>QY<sup>a</sup></b> | <b>Log <math>\epsilon</math> (M<sup>-1</sup>cm<sup>-1</sup>)</b> | <b>Stokes Shifts (nm<sup>-1</sup>)</b> |
| <b>BDP-<i>o</i>CB-41<sup>b</sup></b> | <i>oCB</i>       | 538                         | n/a                        | 0.01                  | 4.37                                                             |                                        |
| <b>BDP-<i>o</i>CB-42</b>             | <i>oCB</i>       | 544                         | 556                        | 0.52                  | 4.42                                                             | 12                                     |
| <b>BDP-<i>o</i>CB-43</b>             | <i>oCB</i>       | 537                         | 553                        | 0.29                  | 4.54                                                             | 16                                     |
| <b>BDP-<i>o</i>CB-44</b>             | <i>oCB</i>       | 554                         | 576                        | 0.065                 | 4.45                                                             | 22                                     |
| <b>BDP-<i>o</i>CB-45</b>             | <i>oCB</i>       | 577                         | 608                        | 0.060                 | 4.29                                                             | 31                                     |
| <b>BDP-<i>o</i>CB-46</b>             | <i>oCB</i>       | 582                         | 609                        | 0.090                 | 4.16                                                             | 27                                     |
| <b>BDP-<i>p</i>CB-47<sup>b</sup></b> | <i>pCB</i>       | 531                         | 545                        | 0.03                  | 4.68                                                             | 14                                     |
| <b>BDP-<i>o</i>CB-48</b>             | <i>oCB</i>       | 521                         | 540                        | 0.58                  | 4.18                                                             | 19                                     |

<sup>a</sup>Rhodamine 6G in ethanol (0.95) was used as standard for all compounds except for **BDP-*o*CB-42** and **BDP-*o*CB-43**, for which violet perchlorate in methanol (0.54) as the standard was used.

<sup>b</sup>Measured in DMSO

**Table S7.** Photophysical properties of BODIPYs decorates with mercaptocarboranes in EtOH. (Zaitsev et al., 2022a), (Zaitsev et al., 2022b), (Zaitsev et al., 2023).

| <b>Compound</b>             |                  |                             |                            |           |                                                              |                           |
|-----------------------------|------------------|-----------------------------|----------------------------|-----------|--------------------------------------------------------------|---------------------------|
| #                           | <b>CB Isomer</b> | $\lambda_{\text{abs}}$ (nm) | $\lambda_{\text{em}}$ (nm) | <b>QY</b> | <b><math>\epsilon</math> (M<sup>-1</sup>cm<sup>-1</sup>)</b> | <b>Stokes Shifts (nm)</b> |
| <b>BDP-<i>o</i>CB-53</b>    | <i>oCB</i>       | 515                         | 538                        | 0.63      | 34500                                                        | 23                        |
| <b>BDP-<i>o</i>CB-54</b>    | <i>oCB</i>       | 514                         | 530                        | 1         | 44380                                                        | 16                        |
| <b>BDP-<i>m</i>CB-55</b>    | <i>mCB</i>       | 513                         | 538                        | 0.62      | 41060                                                        | 25                        |
| <b>BDP-<i>m</i>CB-56</b>    | <i>mCB</i>       | 513                         | 528                        | 0.97      | 68310                                                        | 15                        |
| <b>BDP-<i>mono</i>CB-57</b> | <i>monoCB</i>    | 514                         | 538                        | 0.66      | 26850                                                        | 24                        |
| <b>BDP-<i>mono</i>CB-58</b> | <i>monoCB</i>    | 513                         | 538                        | 1         | 44410                                                        | 25                        |
| <b>BDP-<i>o</i>CB-59</b>    | <i>oCB</i>       | 593                         | 612                        | 1         | 75500                                                        | 19                        |
| <b>BDP-<i>m</i>CB-60</b>    | <i>mCB</i>       | 596                         | 615                        | 1         | 77300                                                        | 19                        |
| <b>BDP-<i>mono</i>CB-61</b> | <i>monoCB</i>    | 607                         | 625                        | 0.89      | 82000                                                        | 18                        |
| <b>BDP-<i>o</i>CB-62</b>    | <i>oCB</i>       | 593                         | 615                        | 1         | 80700                                                        | 22                        |
| <b>BDP-<i>m</i>CB-63</b>    | <i>mCB</i>       | 595                         | 618                        | 0.97      | 85600                                                        | 23                        |
| <b>BDP-<i>mono</i>CB-64</b> | <i>monoCB</i>    | 607                         | 632                        | 0.91      | 83900                                                        | 25                        |

**Table S8.** Crystallographic parameters measured for *meso*-substituted carboranylthio BODIPY structures. See Figure 1a for the molecular structures and Chart 1 for nomenclature.

| <b>BODIPY</b>            | <b>Torsion Angle (°)<br/>C=C–S–Cc</b> | <b>QY (solvent)</b>                      |
|--------------------------|---------------------------------------|------------------------------------------|
| <b>BDP-<i>o</i>CB-41</b> | 88.7                                  | 0.065 (DMSO)                             |
| <b>BDP-<i>o</i>CB-43</b> | 93.9                                  | 0.29 (CH <sub>2</sub> Cl <sub>2</sub> )  |
| <b>BDP-<i>o</i>CB-45</b> | 86.2                                  | 0.060 (CH <sub>2</sub> Cl <sub>2</sub> ) |
| <b>BDP-<i>p</i>CB-47</b> | 99.6                                  | 0.03 (DMSO)                              |

**Table S9.** Crystallography parameters measured for 3/5-substituted carboranylthio BODIPY structures. See Figure 1b for the molecular structures and Chart 1 for nomenclature.

| <b>BODIPY</b>                 | <b>Pyrrole to CB Torsion Angles (°)</b>      | <b>QY (solvent)</b>                     |
|-------------------------------|----------------------------------------------|-----------------------------------------|
| <b>BDP-<i>o</i>CB-48</b>      | C(6)–C(5)–S–Cc: -86.4                        | 0.58 (CH <sub>2</sub> Cl <sub>2</sub> ) |
| <b>BDP-<i>m</i>CB-60</b>      | C(2)–C(3)–S–B: 10.0<br>C(6)–C(5)–S–B: -9.0   | 1.0 (acetone)                           |
| <b>BDP-<i>m</i>CB-63</b>      | C(2)–C(3)–S–B: 15.96<br>C(6)–C(5)–S–B: -9.0  | 1.0 (acetone)                           |
| <b>BDP-<i>o</i>CB-NUXKID*</b> | C(2)–C(3)–C–S: 84.7<br>C(6)–C(5)–S–Cc: -90.3 | -                                       |

\* Ning Zhao, M. Graca H. Vicente, F. R. Froncsek, CSC Communication (Private Communication), 2020, CCDC 2017688.

**Table S10.** Crystallography parameters measured for carboranyl-aryl BODIPY structures. See Figure 2 for the molecular structures and Chart 1 for nomenclature.

| <b>BODIPY</b>               | <b>Meso-aryl group to BODIPY<br/>plane Angles (°)</b> | <b>QY (solvent)</b> |
|-----------------------------|-------------------------------------------------------|---------------------|
| <b>BDP-ref</b>              | 56.06                                                 | 0.007 (EtOH)        |
| <b>BDP-Me-<i>o</i>CB-35</b> | 52.64                                                 | 0.011 (EtOH)        |
| <b>BDP-Ph-<i>o</i>CB-36</b> | 50.26                                                 | 0.012 (EtOH)        |
| <b>BDP-Ph-<i>m</i>CB-37</b> | 58.07                                                 | 0.006 (EtOH)        |
| <b>BDP-15</b>               | 59.13-60.7                                            | -                   |
| <b>BDP-<i>m</i>CB-60</b>    | 63.51-66.37                                           | 1.0 (acetone)       |
| <b>BDP-<i>m</i>CB-63</b>    | 65.39                                                 | 1.0 (acetone)       |

**Table S11.** Photophysical data for anionic boron clusters-BODIPY conjugates.(Chaari et al., 2018)

| <b>Compound</b>              | $\lambda_{\text{abs}}$ (nm) | $\epsilon/10^5$ ( $\text{M}^{-1} \text{cm}^{-1}$ ) | $\lambda_{\text{em}}$ (nm) | <b>QY<sup>a</sup></b> | <b>Stokes shift<br/>(nm)</b> |
|------------------------------|-----------------------------|----------------------------------------------------|----------------------------|-----------------------|------------------------------|
| <b>BDP-DCB-1</b>             | 496                         | 0.536                                              | 517                        | 0.06                  | 21                           |
| <b>BDP-DCB-2</b>             | 497                         | 0.495                                              | 516                        | 0.06                  | 19                           |
| <b>BDP-DCB-2<sup>b</sup></b> | 494                         | 0.350                                              | 513                        | 0.03                  | 19                           |
| <b>BDP-CoMCB-1</b>           | 497                         | 0.582                                              | 520                        | 0.04                  | 23                           |
| <b>BDP-CoMCB-2</b>           | 497                         | 0.433                                              | 519                        | 0.04                  | 22                           |
| <b>BDP-FeMCB-1</b>           | 497                         | 0.560                                              | 504                        | 0.03                  | 7                            |

<sup>a</sup>Reference compound Rhodamine 6G (EtOH, QY = 0.94); <sup>b</sup>in water

**Table S12.** Permeability and Partition coefficient (Log P) of some compounds.(Wang et al., 2014), (Gibbs et al., 2015), (Zhao et al., 2015), (Xuan et al., 2016)

| Compound                 | Pe 10 <sup>-6</sup> (cm/s) | Log P |
|--------------------------|----------------------------|-------|
| <b>BDP-<i>o</i>CB-41</b> | 38.75                      | 0.85  |
| <b>BDP-<i>o</i>CB-42</b> | 164                        | 1.50  |
| <b>BDP-<i>o</i>CB-43</b> | 60                         | 1.69  |
| <b>BDP-<i>o</i>CB-44</b> | 44                         | 1.63  |
| <b>BDP-<i>o</i>CB-45</b> | 26                         | 1.95  |
| <b>BDP-<i>o</i>CB-46</b> | 54                         | 1.93  |
| <b>BDP-<i>p</i>CB-47</b> | 0.38                       | 0.89  |
| <b>BDP-<i>o</i>CB-48</b> | -                          | 2.70  |

**Table 13.** Spectroscopic data of **BDP-*nido*CB-1** and **BDP-*nido*CB 2**

| Compound                   | Solvent           | Max $\lambda_{\text{abs}}$<br>[nm] | Max $\lambda_{\text{em}}$<br>[nm] | Stokes shift<br>[cm <sup>-1</sup> ] | $\epsilon_{\text{max}}$<br>[M <sup>-1</sup> cm <sup>-1</sup> ] |
|----------------------------|-------------------|------------------------------------|-----------------------------------|-------------------------------------|----------------------------------------------------------------|
| <b>BDP-<i>nido</i>CB-1</b> | DCM               | 512                                | 569                               | 1956                                | 68812                                                          |
|                            | CHCl <sub>3</sub> | 513                                | 567                               | 1856                                | 69790                                                          |
|                            | Acetone           | 507                                | 559                               | 1834                                | 73746                                                          |
|                            | DMF               | 509                                | 561                               | 1821                                | 69557                                                          |
|                            | THF               | 509                                | 562                               | 1852                                | 72549                                                          |
| <b>BDP-<i>nido</i>CB-2</b> | DCM               | 577                                | 634                               | 1558                                | 63459                                                          |
|                            | CHCl <sub>3</sub> | 582                                | 640                               | 1557                                | 60882                                                          |
|                            | Acetone           | 570                                | 623                               | 1492                                | 65681                                                          |
|                            | DMF               | 574                                | 602                               | 810                                 | 58557                                                          |
|                            | THF               | 575                                | 630                               | 1518                                | 67718                                                          |

## References

- Bellomo, C., Chaari, M., Cabrera-González, J., Blangetti, M., Lombardi, C., Deagostino, A., et al. (2018). Carborane-BODIPY Dyads: New Photoluminescent Materials through an Efficient Heck Coupling. *Chem. - A Eur. J.* 24, 15622–15630. doi: 10.1002/chem.201802901
- Bellomo, C., Zanetti, D., Cardano, F., Sinha, S., Chaari, M., Fin, A., et al. (2021). Red light-emitting Carborane-BODIPY dyes: Synthesis and properties of visible-light tuned fluorophores with enhanced boron content. *Dye. Pigment.* 194. doi: 10.1016/j.dyepig.2021.109644
- Brouwer, A. M. (2011). Standards for photoluminescence quantum yield measurements in solution (IUPAC technical report). *Pure Appl. Chem.* 83, 2213–2228. doi: 10.1351/PAC-REP-10-09-31
- Chaari, M., Gaztelumendi, N., Cabrera-González, J., Peixoto-Moledo, P., Viñas, C., Xochitiotzi-Flores, E., et al. (2018). Fluorescent BODIPY-Anionic Boron Cluster Conjugates as Potential Agents for Cell Tracking. *Bioconjug. Chem.* 29, 1763–1773. doi: 10.1021/acs.bioconjchem.8b00204
- Fischer, M., and Georges, J. (1996). Fluorescence quantum yield of rhodamine 6G in ethanol as a function of concentration using thermal lens spectrometry. *Chem. Phys. Lett.* 260, 115–118. doi: 10.1016/0009-2614(96)00838-X
- Gibbs, J. H., Wang, H., Bhupathiraju, N. V. S. D. K., Fronczek, F. R., Smith, K. M., and Vicente, M. G. H. (2015). Synthesis and properties of a series of carboranyl-BODIPYs. *J. Organomet. Chem.* 798, 209–213. doi: 10.1016/j.jorganchem.2015.05.009
- Godoy, J., Vives, G., and Tour, J. M. (2010). Synthesis of highly fluorescent BODIPY-based nanocars. *Org. Lett.* 12, 1464–1467. doi: 10.1021/ol100108r
- Hablot, D., Sutter, A., Retailleau, P., and Ziessel, R. (2012). Unsymmetrical p-carborane backbone as a linker for donor-acceptor dyads. *Chem. - A Eur. J.* 18, 1890–1895. doi: 10.1002/chem.201103307
- Hablot, D., Ziessel, R., Alamiry, M. A. H., Bahraidah, E., and Harriman, A. (2013). Nanomechanical properties of molecular-scale bridges as visualised by intramolecular electronic energy transfer. *Chem. Sci.* 4, 444–453. doi: 10.1039/c2sc21505e

- Harriman, A., Alamiry, M. A. H., Hagon, J. P., Hablot, D., and Ziesel, R. (2013). Through-space electronic energy transfer across proximal molecular dyads. *Angew. Chemie - Int. Ed.* 52, 6611–6615. doi: 10.1002/anie.201302081
- Jin, G. F., Cho, Y. J., Wee, K. R., Hong, S. A., Suh, I. H., Son, H. J., et al. (2015). BODIPY functionalized o-carborane dyads for low-energy photosensitization. *Dalt. Trans.* 44, 2780–2787. doi: 10.1039/c4dt03123g
- Labra-Vázquez, P., Flores-Cruz, R., Galindo-Hernández, A., Cabrera-González, J., Guzmán-Cedillo, C., Jiménez-Sánchez, A., et al. (2020). Tuning the Cell Uptake and Subcellular Distribution in BODIPY–Carboranyl Dyads: An Experimental and Theoretical Study. *Chem. - A Eur. J.* 26, 16530–16540. doi: 10.1002/chem.202002600
- Nostrand, V., Hopflinger, A., Verlag, S., Rubber, C., and Correo, C. De (1980). But This. 1871–1872.
- Tominaga, M., Naito, H., Morisaki, Y., and Chujo, Y. (2014). Control of the Emission Behaviors of Trifunctional o-Carborane Dyes. *Asian J. Org. Chem.* 3, 624–631. doi: 10.1002/ajoc.201300280
- Wang, H., Vicente, M. G. H., Fronczek, F. R., and Smith, K. M. (2014). Synthesis and transformations of 5-chloro-2,2'-dipyrrins and their boron complexes, 8-chloro-BODIPYs. *Chem. - A Eur. J.* 20, 5064–5074. doi: 10.1002/chem.201304310
- Xuan, S., Zhao, N., Zhou, Z., Fronczek, F. R., and Vicente, M. G. H. (2016). Synthesis and in Vitro Studies of a Series of Carborane-Containing Boron Dipyrrromethenes (BODIPYs). *J. Med. Chem.* 59, 2109–2117. doi: 10.1021/acs.jmedchem.5b01783
- Zaitsev, A. V., Kiselev, S. S., Smol'yakov, A. F., Fedorov, Y. V., Kononova, E. G., Borisov, Y. A., et al. (2023). BODIPY derivatives modified with carborane clusters: synthesis, characterization and DFT studies. *Org. Biomol. Chem.* 21, 4084–4094. doi: 10.1039/D3OB00255A
- Zaitsev, A. V., Kononova, E. G., Markova, A. A., Shibaeva, A. V., Kostyukov, A. A., Egorov, A. E., et al. (2022a). A straightforward approach to carborane-substituted BODIPY derivatives via nucleophilic aromatic substitution: Synthesis and photodynamic properties. *Dye. Pigment.* 207, 110711. doi: 10.1016/j.dyepig.2022.110711
- Zaitsev, A. V., Morozyuk, A. S., Kononova, E. G., Smol'yakov, A. F., and

Ol'shevskaya, V. A. (2022b). Maleimide-functionalized BODIPY dyes: Synthesis, structural determination and conjugation with carborane thiols. *J. Porphyr. Phthalocyanines* 26, 741–747. doi: 10.1142/S1088424622500596

Zhao, N., Vicente, M. G. H., Fronczek, F. R., and Smith, K. M. (2015). Synthesis of 3,8-Dichloro-6-ethyl-1,2,5,7-tetramethyl-BODIPY from an Asymmetric Dipyrroketone and Reactivity Studies at the 3,5,8-Positions. *Chem. - A Eur. J.* 21, 6181–6192. doi: 10.1002/chem.201406550

Ziessel, R., Ulrich, G., Olivier, J. H., Bura, T., and Sutter, A. (2010). Carborane-Bodipy scaffolds for through space energy transfer. *Chem. Commun.* 46, 7978–7980. doi: 10.1039/c0cc02656e
